# Supplementary material for: An antimalarial drug, tafenoquine, as a fluorescent receptor for ratiometric detection of hypochlorite
Source: Royal Society of Chemistry journal article supplement (doi:10.1039/c7ra04867j), 2017-01-01
Supplement: c7ra04867j1.pdf [file c7ra04867j1.pdf]

## Electronic Supplementary Information (ESI†)

### An antimalarial drug, Tafenoquine, as a fluorescent receptor for ratiometric detection of hypochlorite

Avijit Kumar Das,<sup>a</sup> Naoto Hayashi,<sup>a</sup> Yasuhiro Shiraishi,<sup>a,b,\*</sup> and Takayuki Hirai<sup>a</sup>

<sup>a</sup> *Research Center for Solar Energy Chemistry, and Division of Chemical Engineering, Graduate School of Engineering Science, Osaka University, Toyonaka 560-8531, Japan*

<sup>b</sup> *PRESTO, JST, Saitama 332-0012, Japan*

*shiraish@cheng.es.osaka-u.ac.jp*

## CONTENTS

|                                                                                            | Page |
|--------------------------------------------------------------------------------------------|------|
| <b>Table S1.</b> TD-DFT calculation results for <b>TQ</b> .....                            | 2    |
| <b>Table S2.</b> TD-DFT calculation results for <b>TQA</b> .....                           | 2    |
| <b>Fig. S1</b> <sup>1</sup> H NMR spectra of <b>TQ</b> .....                               | 3    |
| <b>Fig. S2</b> <sup>13</sup> C NMR spectra of <b>TQ</b> .....                              | 3    |
| <b>Fig. S3</b> ESI-MS chart of <b>TQ</b> .....                                             | 4    |
| <b>Fig. S4</b> Time-dependent change of <b>TQ</b> after addition of ClO <sup>-</sup> ..... | 4    |
| <b>Fig. S5</b> Effect of water content on the fluorescence intensity of <b>TQ</b> .....    | 5    |
| <b>Fig. S6</b> <sup>1</sup> H NMR spectra of <b>TQA</b> .....                              | 5    |
| <b>Fig. S7</b> <sup>13</sup> C NMR spectra of <b>TQA</b> .....                             | 6    |
| <b>Fig. S8</b> EI-MS chart of <b>TQA</b> .....                                             | 6    |
| <b>Fig. S9</b> pH-Dependent change in the fluorescence intensity of <b>TQ</b> .....        | 7    |
| <b>Fig. S10</b> UV-vis absorption spectra of <b>TQ</b> and <b>TQA</b> .....                | 7    |
| <b>Cartesian coordinates for respective compounds</b> .....                                | 8    |

**Table S1.** Calculated excitation energy ( $E$ ), wavelength ( $\lambda$ ), and oscillator strength ( $f$ ) for low-lying singlet state ( $S_n$ ) of **TQ**.

|                       | Main orbital transition (CIC <sup>[a]</sup> )                                                                     | $E$ (eV) [ $\lambda$ (nm)] | $f$    |
|-----------------------|-------------------------------------------------------------------------------------------------------------------|----------------------------|--------|
| $S_0 \rightarrow S_1$ | HOMO $\rightarrow$ LUMO (0.65609)                                                                                 | 3.2504 eV [381.45 nm]      | 0.1279 |
| $S_0 \rightarrow S_2$ | HOMO $\rightarrow$ LUMO+1 (0.70067)                                                                               | 3.2837 eV [377.57 nm]      | 0.0047 |
| $S_0 \rightarrow S_3$ | HOMO-2 $\rightarrow$ LUMO (0.25471)<br>HOMO $\rightarrow$ LUMO+2 (0.5941)<br>HOMO $\rightarrow$ LUMO+3 (0.26032)  | 3.9471 eV [314.11 nm]      | 0.0387 |
| $S_0 \rightarrow S_4$ | HOMO-2 $\rightarrow$ LUMO (0.23814)<br>HOMO $\rightarrow$ LUMO+2 (-0.35569)<br>HOMO $\rightarrow$ LUMO+3 (0.5541) | 4.0808 eV [303.82 nm]      | 0.0164 |
| $S_0 \rightarrow S_5$ | HOMO-1 $\rightarrow$ LUMO (0.70656)                                                                               | 4.3939 eV [282.18 nm]      | 0.0005 |
| $S_0 \rightarrow S_6$ | HOMO $\rightarrow$ LUMO+4 (0.67749)<br>HOMO $\rightarrow$ LUMO+7 (-0.13443)                                       | 4.5361 eV [273.33 nm]      | 0.0033 |

[a] CI expansion coefficients for the main transitions.

**Table S2.** Calculated excitation energy ( $E$ ), wavelength ( $\lambda$ ), and oscillator strength ( $f$ ) for low-lying singlet state ( $S_n$ ) of **TQA**.

|                       | Main orbital transition (CIC <sup>[a]</sup> )                                                                                                             | $E$ (eV) [ $\lambda$ (nm)] | $f$    |
|-----------------------|-----------------------------------------------------------------------------------------------------------------------------------------------------------|----------------------------|--------|
| $S_0 \rightarrow S_1$ | HOMO-1 $\rightarrow$ LUMO (0.12712)<br>HOMO $\rightarrow$ LUMO (0.68395)                                                                                  | 3.2077 eV [386.52 nm]      | 0.0395 |
| $S_0 \rightarrow S_2$ | HOMO-1 $\rightarrow$ LUMO (-0.12354)<br>HOMO-1 $\rightarrow$ LUMO+1 (-0.15968)<br>HOMO $\rightarrow$ LUMO+1 (0.67142)                                     | 3.7963 eV [326.59 nm]      | 0.0018 |
| $S_0 \rightarrow S_3$ | HOMO-1 $\rightarrow$ LUMO (0.62457)<br>HOMO $\rightarrow$ LUMO+1 (0.14013)                                                                                | 3.8474 eV [322.25 nm]      | 0.1162 |
| $S_0 \rightarrow S_4$ | HOMO-1 $\rightarrow$ LUMO+1 (0.68184)<br>HOMO $\rightarrow$ LUMO+1 (0.15955)                                                                              | 4.159 eV [298.11 nm]       | 0.0013 |
| $S_0 \rightarrow S_5$ | HOMO-2 $\rightarrow$ LUMO (0.28411)<br>HOMO-1 $\rightarrow$ LUMO (-0.11473)<br>HOMO $\rightarrow$ LUMO+2 (0.44011)<br>HOMO $\rightarrow$ LUMO+3 (-0.4347) | 4.2916 eV [288.9 nm]       | 0.0637 |

[a] CI expansion coefficients for the main transitions.

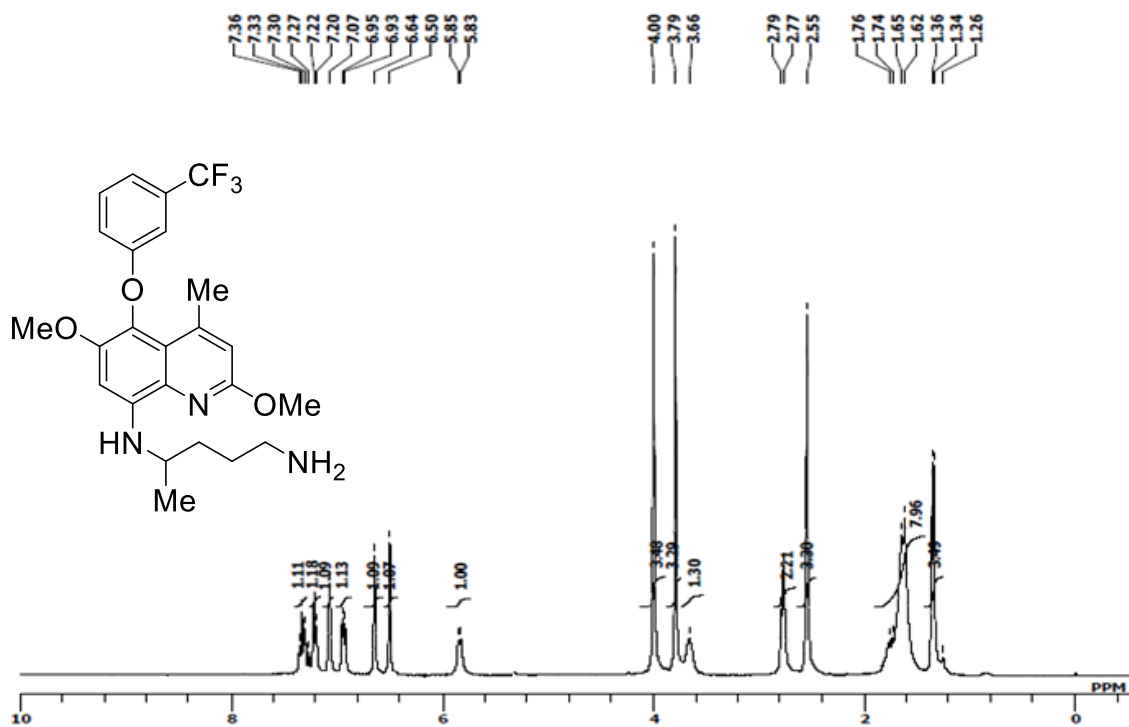

Fig. S1 <sup>1</sup>H NMR spectra of TQ

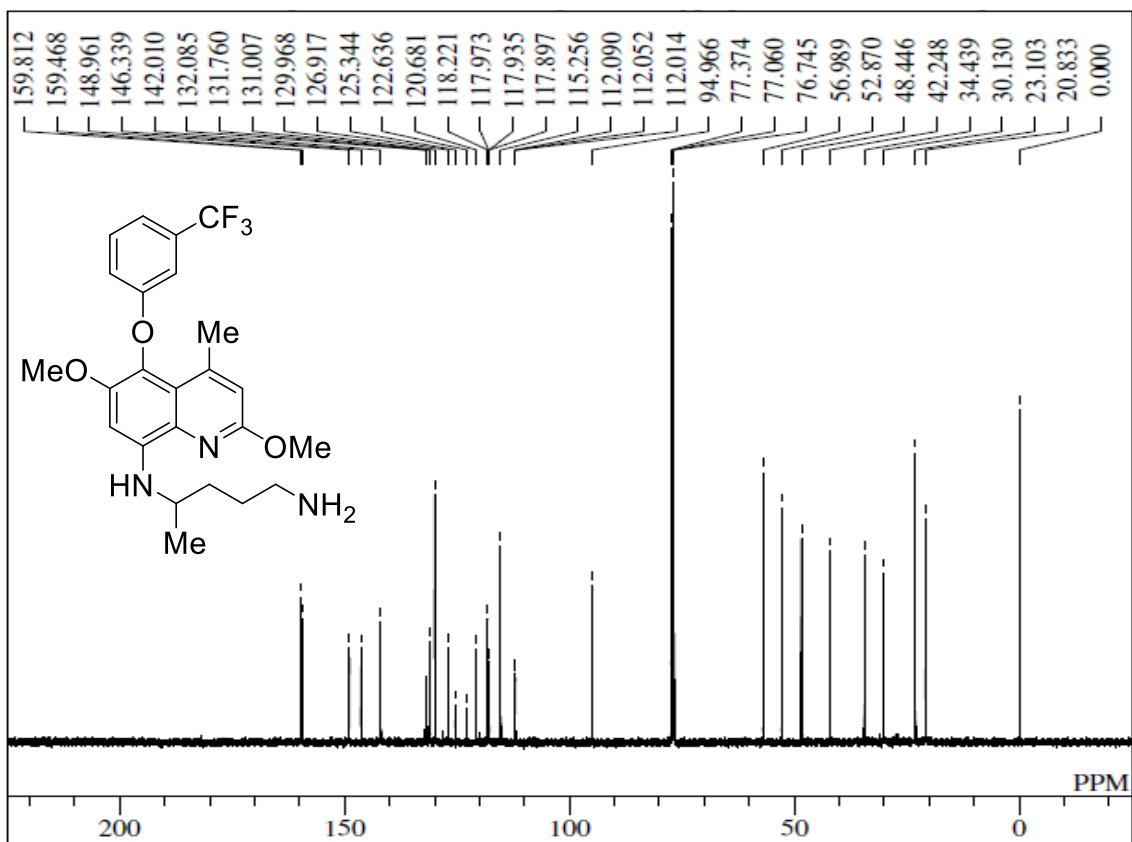

Fig. S2 <sup>13</sup>C NMR spectra of TQ

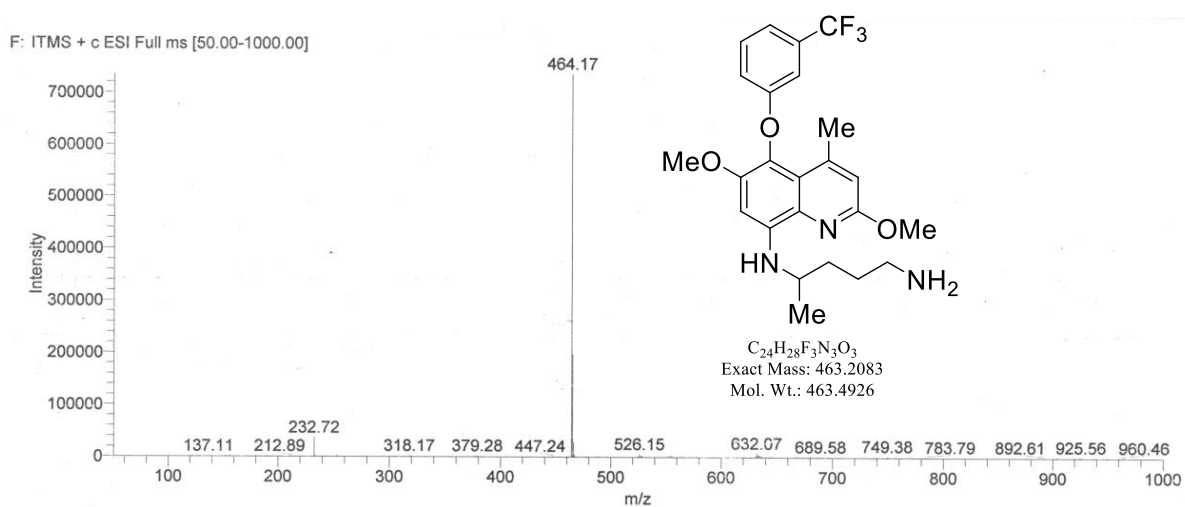

**Fig. S3** ESI-MS chart of TQ

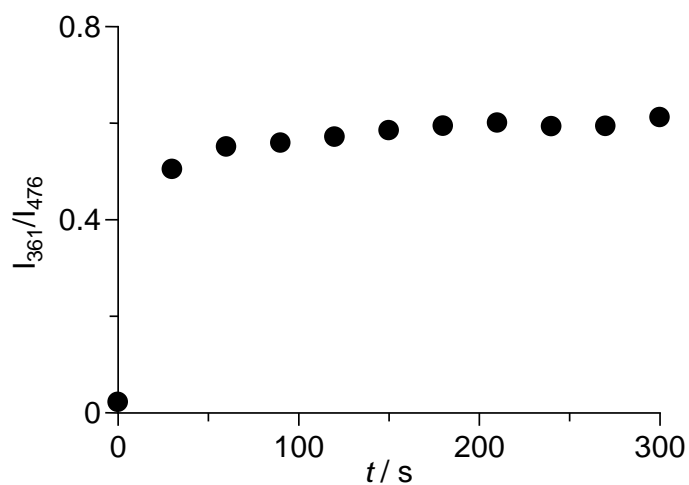

**Fig. S4** Time-dependent change in the ratio of fluorescence intensity ( $I_{361}/I_{476}$ ) of TQ after addition of  $\text{OCl}^-$  to a buffered water/MeCN (3/7 v/v) mixture (HEPES, 0.1 M, pH 7.4) at 25 °C, where  $I_{361}$  is the intensity at  $\lambda_{\text{em}} = 361$  nm and  $I_{476}$  is the intensity at  $\lambda_{\text{em}} = 476$  nm, respectively.

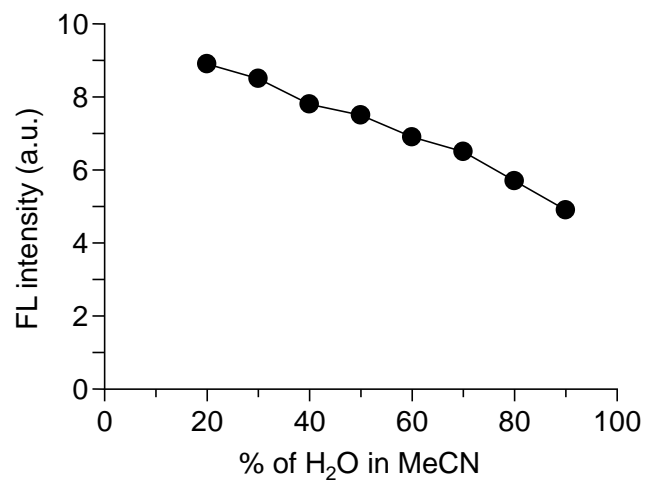

**Fig. S5** Effect of water content in solution on the fluorescence intensity of **TQ** with 100 equiv of  $\text{OCI}^-$  at 361 nm.

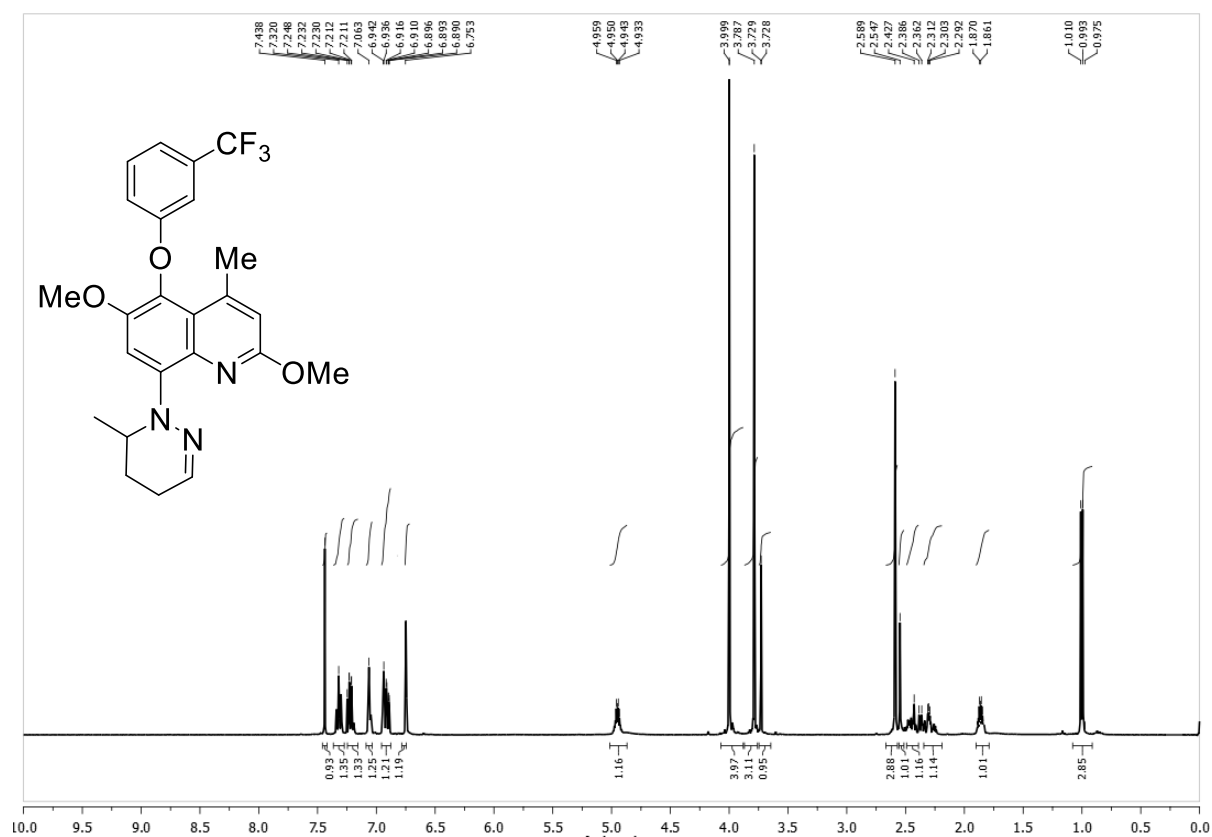

**Fig. S6**  $^1\text{H}$  NMR spectra of **TQA**

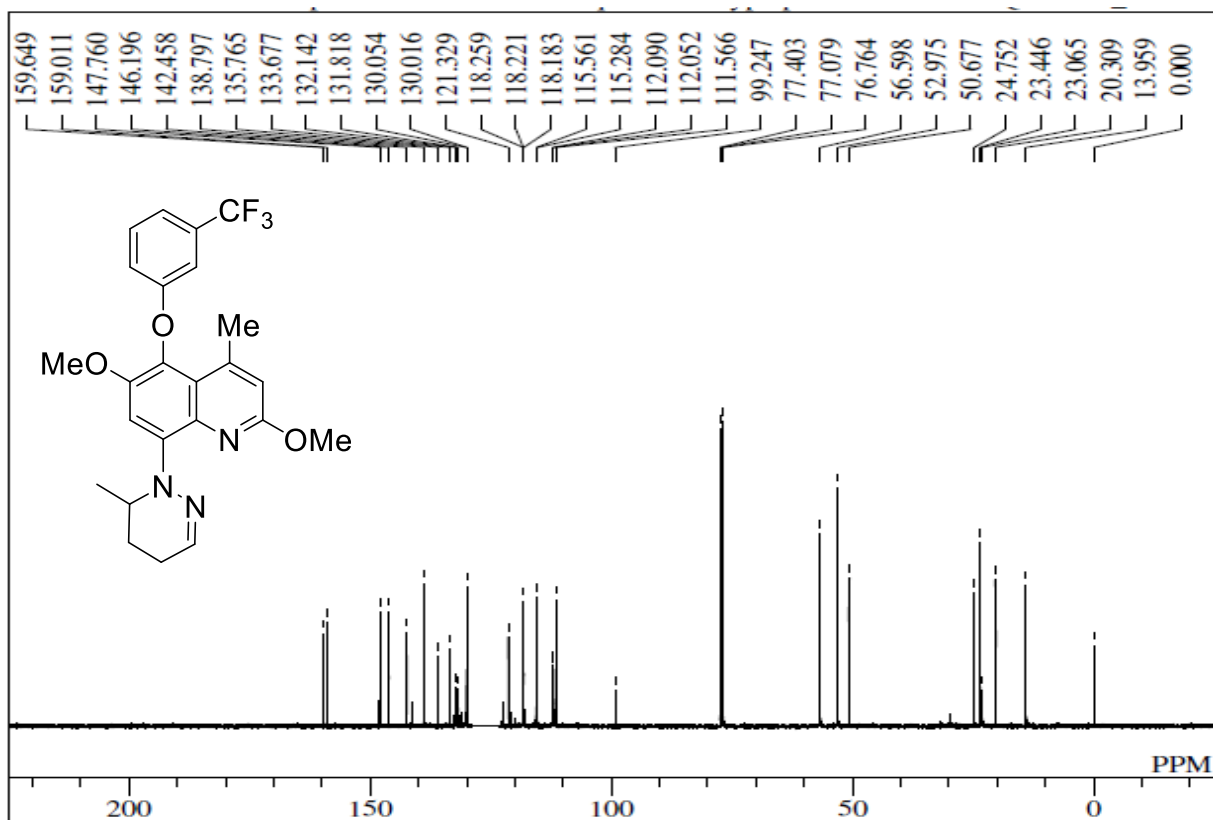

Fig. S7 <sup>13</sup>C NMR spectra of TQA

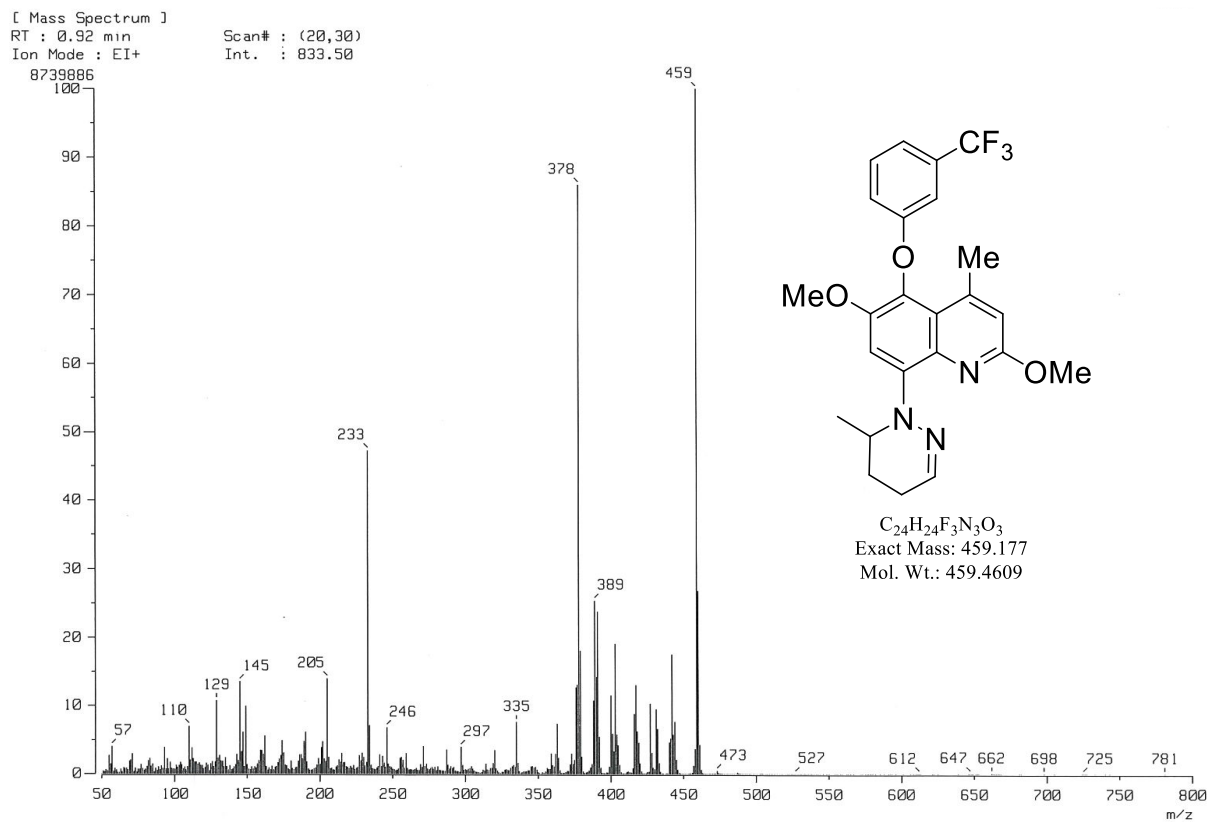

Fig. S8 EI-MS chart of TQA

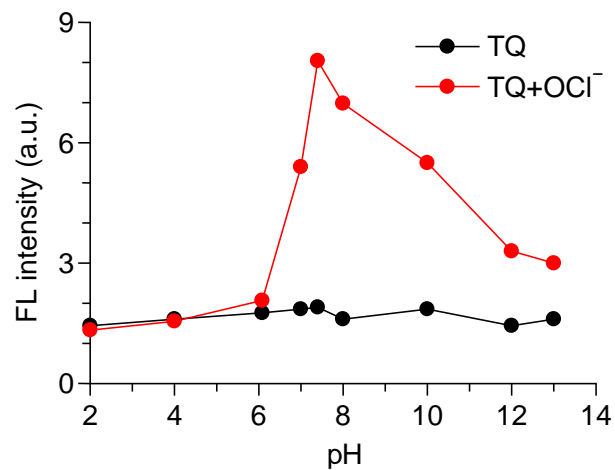

**Fig. S9** Fluorescence intensity of **TQ** (20 μM) at 361 nm under different pH conditions (red) with and (black) without OCl<sup>-</sup> (2 mM).

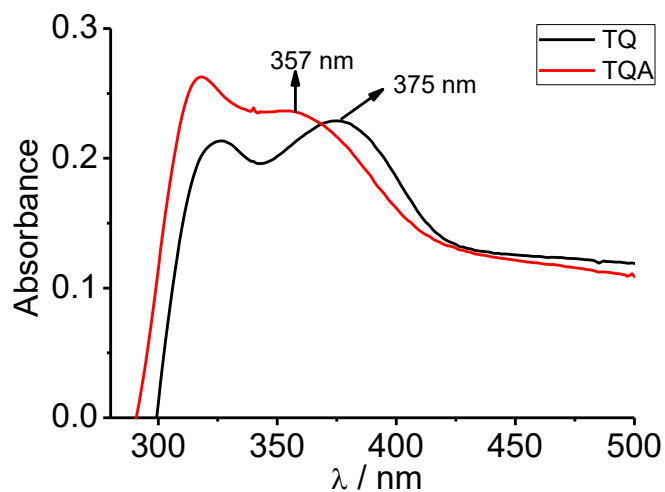

**Fig. S10** UV-vis spectra of **TQ** and **TQA** (20 μM) in a buffered water/MeCN (3/7 v/v) mixture (HEPES 0.1 M, pH 7.4) at 25 °C.

Cartesian Coordinates (in Å<sup>o</sup>) of TQ  
(DFT/B3LYP/6-31+G, PCM: water)

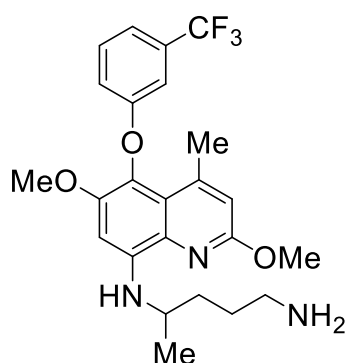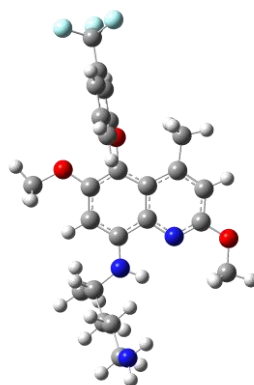

|   |          |          |          |   |          |          |          |
|---|----------|----------|----------|---|----------|----------|----------|
| C | -0.11522 | -1.16043 | -1.08311 | F | -7.37193 | 0.535166 | 1.255029 |
| C | 1.272883 | -1.39498 | -1.03072 | F | -7.31674 | -1.59012 | 0.5674   |
| C | 2.157034 | -0.34313 | -0.76691 | H | 1.655798 | -2.39133 | -1.19808 |
| C | 1.620175 | 0.979845 | -0.56272 | H | 0.452574 | 4.598648 | -0.02743 |
| C | 0.208542 | 1.22245  | -0.61193 | H | 4.036154 | 0.358566 | -0.52408 |
| C | -0.64472 | 0.110113 | -0.8619  | H | 3.708585 | -2.57218 | -0.51123 |
| N | 2.54053  | 1.977823 | -0.32446 | H | 6.230748 | -2.52834 | -0.58997 |
| C | 2.104625 | 3.206075 | -0.13983 | H | 6.17559  | -0.76761 | -0.61747 |
| C | 0.733307 | 3.559615 | -0.17926 | H | 4.980296 | -0.79675 | 1.625574 |
| C | -0.22668 | 2.592889 | -0.41239 | H | 5.060324 | -2.55976 | 1.633816 |
| O | -2.04554 | 0.282064 | -1.00521 | H | 7.546393 | -2.47928 | 1.63815  |
| N | 3.51853  | -0.49712 | -0.68525 | H | 7.506273 | -0.71314 | 1.531716 |
| C | 4.267643 | -1.73295 | -0.95544 | H | 7.769891 | -1.69657 | 3.870911 |
| C | 5.641351 | -1.6623  | -0.2571  | H | 6.379806 | -0.76263 | 3.768415 |
| C | 5.575436 | -1.65506 | 1.280446 | H | -4.58168 | 0.268784 | -1.28361 |
| C | 6.966395 | -1.59319 | 1.927208 | H | -5.53455 | -1.08829 | 2.727737 |
| N | 6.869881 | -1.5817  | 3.402167 | H | -3.10173 | -1.1896  | 3.243549 |
| C | -2.91475 | -0.11774 | 0.021339 | H | -1.42203 | -0.56844 | 1.52156  |
| C | -4.27738 | -0.05073 | -0.291   | H | -1.74262 | 4.108048 | -0.32797 |
| C | -5.21058 | -0.40173 | 0.691276 | H | -2.14925 | 2.752756 | -1.40362 |
| C | -4.80108 | -0.81624 | 1.971491 | H | -2.26382 | 2.553258 | 0.339493 |
| C | -3.43424 | -0.87241 | 2.257474 | H | 4.919    | 4.861474 | 0.350825 |
| C | -2.48244 | -0.52288 | 1.288554 | H | 4.625276 | 3.197279 | 0.964611 |
| C | -1.67548 | 3.023539 | -0.45568 | H | 4.757955 | 3.48521  | -0.79546 |
| O | 2.996718 | 4.234092 | 0.103637 | H | -1.48782 | -4.11924 | -1.68444 |
| C | 4.42939  | 3.907812 | 0.15748  | H | 0.082377 | -3.63251 | -2.38973 |
| O | -1.04032 | -2.16288 | -1.35771 | H | -0.06966 | -3.89151 | -0.61606 |
| C | -0.5782  | -3.5423  | -1.52086 | H | 4.899064 | -2.95408 | -2.65432 |
| C | 4.42274  | -1.98316 | -2.47119 | H | 3.450592 | -1.97809 | -2.97642 |
| C | -6.66674 | -0.34404 | 0.398071 | H | 5.045406 | -1.20067 | -2.92254 |
| F | -6.97249 | 0.069672 | -0.90317 |   |          |          |          |



Cartesian Coordinates (in Å°) of TQA  
(DFT/B3LYP/6-31+G, PCM: water)

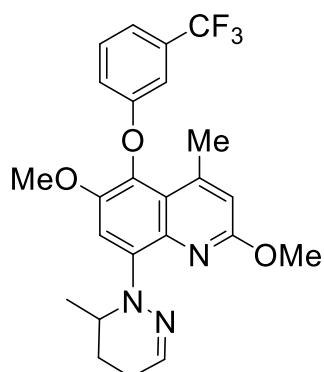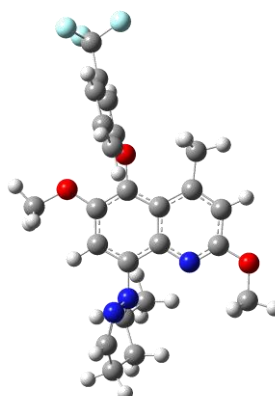

|   |          |          |          |   |          |          |          |
|---|----------|----------|----------|---|----------|----------|----------|
| C | 0.067493 | -1.38024 | -0.50439 | C | -6.48167 | -0.07116 | -0.18872 |
| C | 1.417475 | -1.69865 | -0.26337 | F | -6.56678 | -0.32712 | -1.56591 |
| C | 2.353487 | -0.69793 | -0.04445 | F | -7.03099 | 1.229052 | -0.02461 |
| C | 1.958235 | 0.671595 | -0.04926 | F | -7.4086  | -0.92898 | 0.427049 |
| C | 0.579059 | 1.017121 | -0.30092 | H | 1.752869 | -2.73025 | -0.25706 |
| C | -0.33938 | -0.04618 | -0.51487 | H | 1.030635 | 4.410696 | -0.07281 |
| N | 2.91695  | 1.631699 | 0.201359 | H | -4.13555 | 0.233622 | -1.54527 |
| C | 2.555986 | 2.894387 | 0.188554 | H | -5.78096 | -0.63168 | 2.377136 |
| C | 1.235116 | 3.343279 | -0.07133 | H | -3.47135 | -0.73426 | 3.294496 |
| C | 0.232255 | 2.427865 | -0.31434 | H | -1.51082 | -0.35619 | 1.821344 |
| O | -1.68098 | 0.228385 | -0.85209 | H | 4.416936 | -2.34162 | -1.32981 |
| C | -2.72239 | -0.04261 | 0.052481 | H | 6.772816 | -1.49555 | -1.2544  |
| C | -4.00955 | 0.023624 | -0.48647 | H | 6.294166 | -0.28642 | -0.05358 |
| C | -5.10486 | -0.19465 | 0.358877 | H | 7.143186 | -2.0956  | 1.303325 |
| C | -4.92629 | -0.4656  | 1.726191 | H | 6.443837 | -3.33349 | 0.273857 |
| C | -3.62597 | -0.52307 | 2.238686 | H | 5.107358 | -2.91499 | 2.533427 |
| C | -2.51604 | -0.30999 | 1.409799 | H | 4.623759 | 0.698128 | -1.76355 |
| N | 3.721329 | -1.05249 | 0.193512 | H | 5.120531 | -0.5679  | -2.91515 |
| C | 4.633804 | -1.3195  | -0.95835 | H | 3.410311 | -0.36524 | -2.50465 |
| C | 6.079795 | -1.2955  | -0.42845 | H | -1.14439 | 4.047152 | -0.58635 |
| C | 6.259027 | -2.33245 | 0.694219 | H | -1.54684 | 2.607062 | -1.54646 |
| C | 5.044825 | -2.37812 | 1.587916 | H | -1.87341 | 2.628352 | 0.181199 |
| N | 3.90432  | -1.78958 | 1.365681 | H | 5.409795 | 4.395903 | 0.89     |
| C | 4.427357 | -0.32343 | -2.10178 | H | 4.912428 | 2.810053 | 1.582262 |
| C | -1.16024 | 2.953232 | -0.58387 | H | 5.285956 | 2.938211 | -0.1579  |
| O | 3.49047  | 3.880663 | 0.439728 | H | -1.52907 | -4.26393 | -0.8323  |
| C | 4.876608 | 3.463626 | 0.707716 | H | 0.159305 | -4.03925 | -1.38181 |
| O | -0.91755 | -2.32487 | -0.75959 | H | -0.23471 | -3.97673 | 0.37228  |
| C | -0.58967 | -3.7479  | -0.63808 |   |          |          |          |
